# Supplementary material
Source: PubMed Central journal article supplement (PMC4140192)
Supplement: NIHMS605405-supplement-1.pdf [file NIHMS605405-supplement-1.pdf]

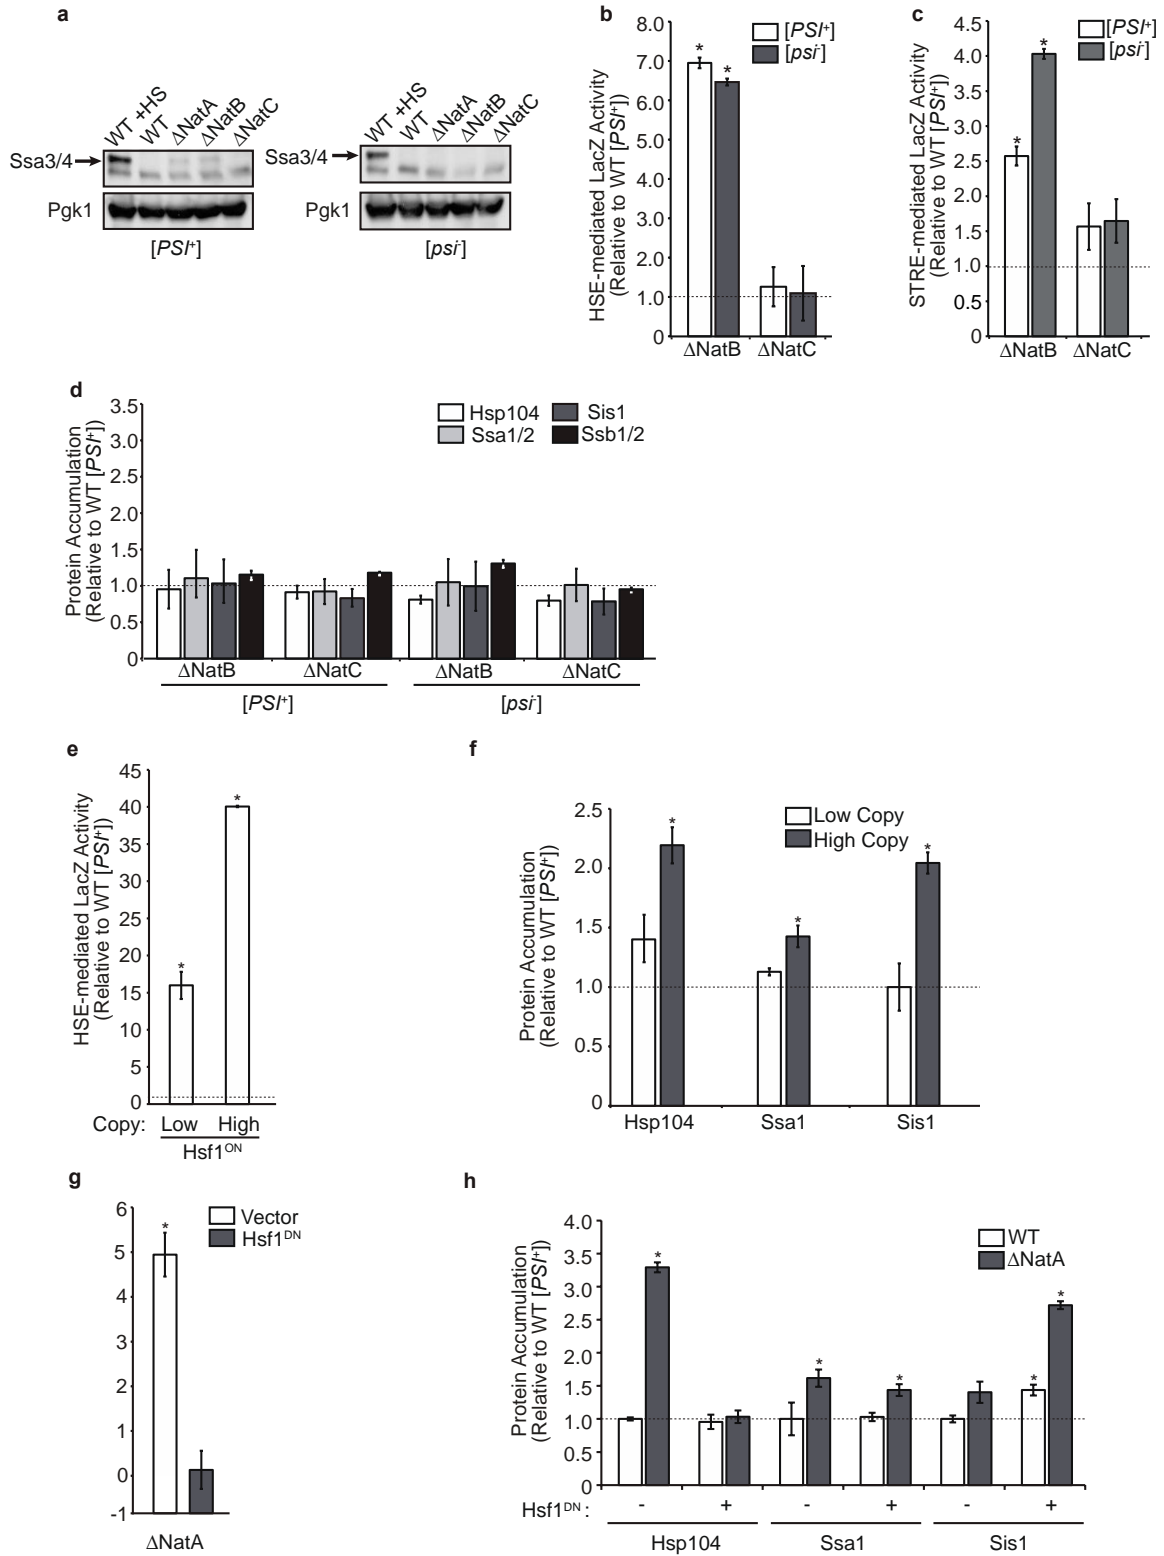

**Supplementary Figure 1. a.** Lysates from [*PSI*<sup>+</sup>] and [*psi*<sup>-</sup>] WT (SLL2606 and SLL21119, respectively),  $\Delta$ NatA (SY319 and SY978, respectively),  $\Delta$ NatB (SY536 and SY563, respectively), and  $\Delta$ NatC (SY540 and SY567, respectively) were isolated from cultures grown at 30°C or 37°C (HS) and analyzed by SDS-PAGE and immunoblotting for Ssa3/4 and Pkg1 (loading control). **b.** Heat shock element (pHSE) activity was analyzed using a  $\beta$ -galactosidase reporter (SB753) expressed in [*PSI*<sup>+</sup>] and [*psi*<sup>-</sup>]  $\Delta$ NatB (SY536 and SY563, respectively) and  $\Delta$ NatC (SY540 and SY567, respectively) strains (n=6, \*p<0.00001 compared to WT [*PSI*<sup>+</sup>] (error bars represent standard deviation). **c.** Stress response element (pSTRE) activity was analyzed using a  $\beta$ -galactosidase reporter (SB757) expressed in [*PSI*<sup>+</sup>] and [*psi*<sup>-</sup>]  $\Delta$ NatB (SY536 and SY563, respectively) and  $\Delta$ NatC (SY540 and SY567, respectively) strains (n=6, \*p<0.005 compared to WT [*PSI*<sup>+</sup>] , error bars represent standard deviation). **d.** Expression of Hsp104, Ssa1/2, Sis1, and Ssb1/2 was determined by analyzing lysates of [*PSI*<sup>+</sup>] and [*psi*<sup>-</sup>]  $\Delta$ NatB (SY536 and SY563, respectively) and  $\Delta$ NatC (SY540 and SY567, respectively) strains by SDS-PAGE and quantitative immunoblotting using specific antisera (n=6, \*p<0.005 compared to WT [*PSI*<sup>+</sup>], error bars represent standard deviation). **e.** pHSE (SB753) reporter activity in strains expressing Hsf1<sup>ON</sup> from both low copy (cen) and high copy (2 $\mu$ ) vectors, as described in (b) (n=3, p<0.0001, error bars represent standard deviation). **f.** Hsp104, Ssa1/2, and Sis1 protein levels in strains expressing Hsf1<sup>ON</sup> from low copy (SY2053) and high copy (SY2130) vectors, collected and analyzed as described in (d) (n=4, \*p<0.005, error bars represent standard deviation). **g.** pHSE reporter activity in strains  $\Delta$ NatA (SY319)  $\pm$  Hsf1<sup>DN</sup> (SB778) compared to WT [*PSI*<sup>+</sup>], as described in (b) (n=4, p<0.0001, error bars represent standard deviation). **h.** Hsp104, Ssa1/2, and Sis1 protein levels in  $\Delta$ NatA  $\pm$  Hsf1<sup>DN</sup> compared to WT, collected and analyzed as described in (d) (n=5, error bars represent standard deviation).

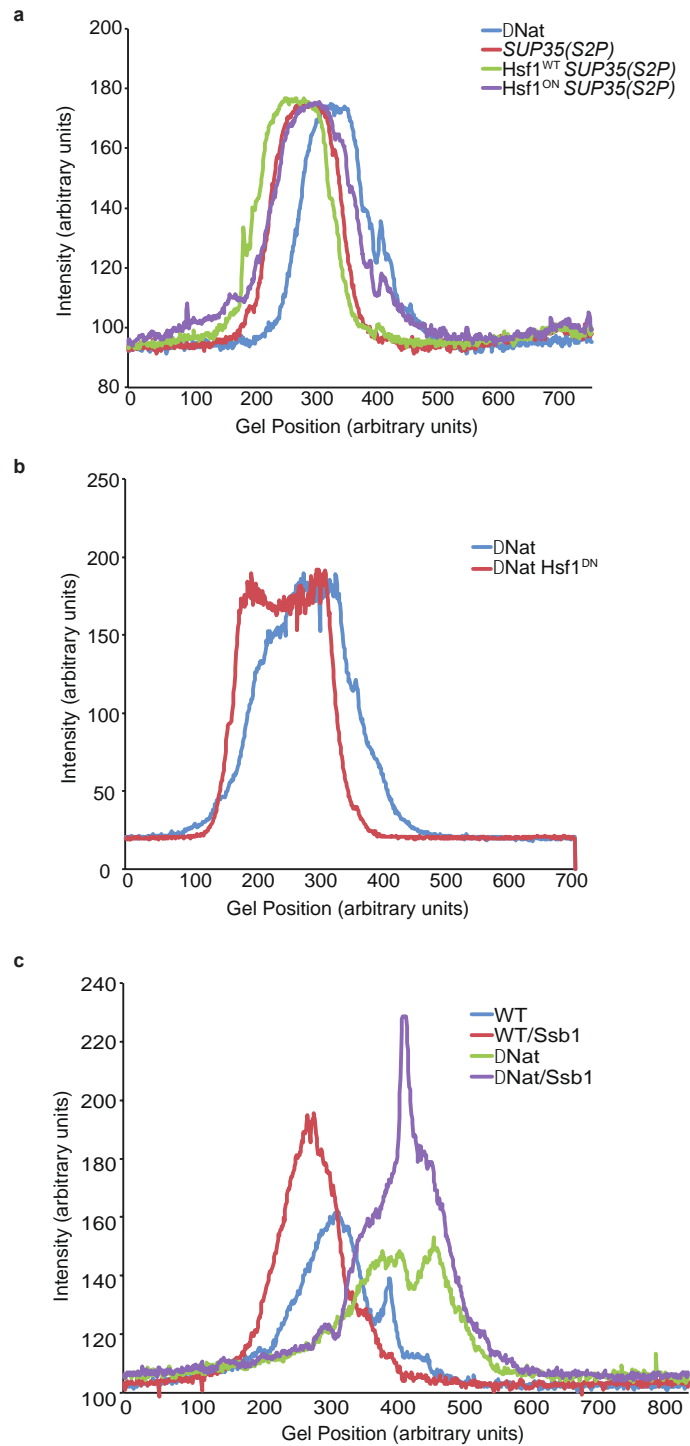

**Supplementary Figure 2.** Densitometry traces (ImageJ) of SDD-AGE gels shown in **a.** Figure 2d, **b.** Figure 2e, and **c.** Figure 3f.

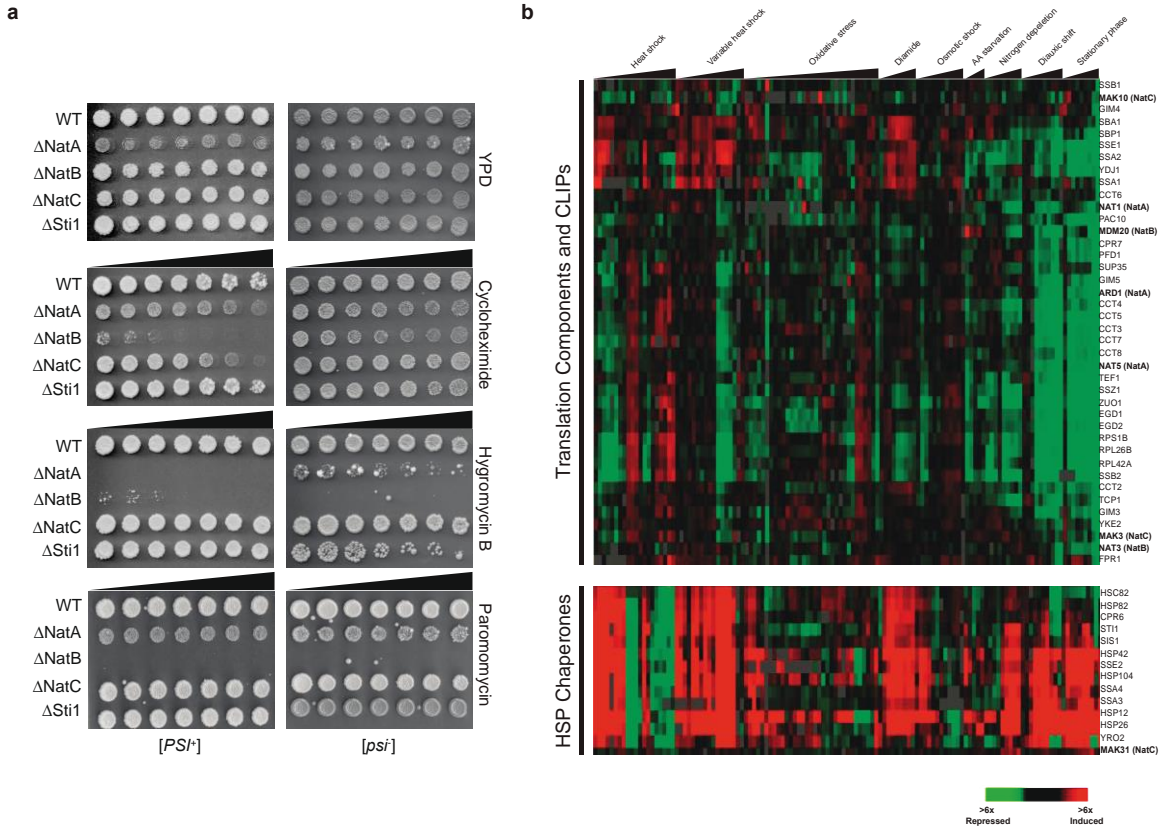

**Supplementary Figure 3. a.** Growth of  $[PSI^+]$  and  $[psi^-]$  WT (SLL2606 and SY2119, respectively),  $\Delta$ NatA (SY319 and SY978, respectively),  $\Delta$ NatB (SY536 and SY563, respectively), and  $\Delta$ NatC (SY540 and SY567, respectively),  $\Delta$ Sti1 (strain #s, respectively) strains on YPD supplemented with a gradient up to 100mg/ml hygromycin B, 800 mg/ml paromomycin, and 100  $\mu$ g/ml cycloheximide

**b.** Gene expression clustering for heat shock chaperones, proteins associated with translation, and N-terminal acetylases. Clustering was performed by the Stanford Microarray Database using a previously published dataset.<sup>1</sup>

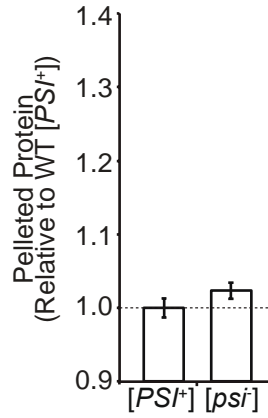

**Supplementary Figure 4.** Quantification of pelleted proteins in lysates isolated from WT [*PSI<sup>+</sup>*] (SLL2606) and [*psi*] (SLL2119) strains, following centrifugation at 15,000 x *g* (n=3, error bars represent standard deviation).

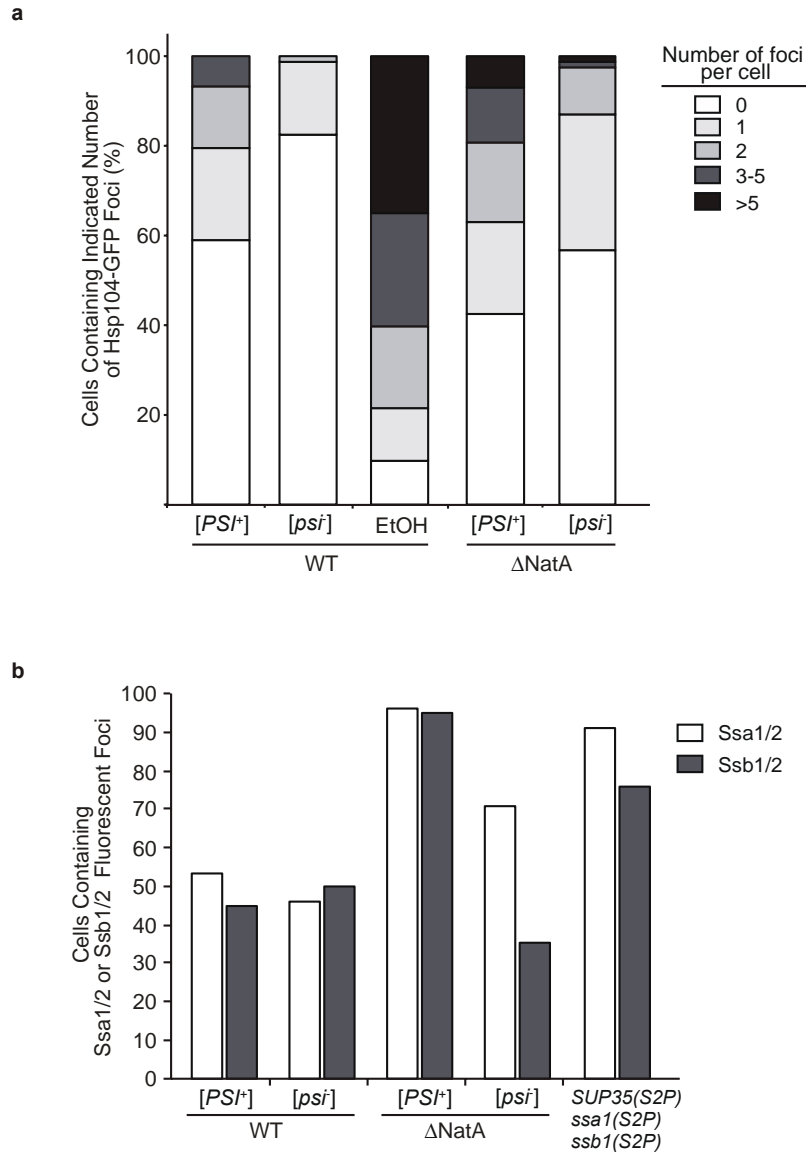

**Supplementary Figure 5. a.** The number of fluorescent foci per cell was determined in WT [PSI<sup>+</sup>] (SY1906) and [psi<sup>-</sup>] (SY2125), WT [PSI<sup>+</sup>] treated with 7.5% ethanol, and ΔNatA [PSI<sup>+</sup>] (SY2152) and [psi<sup>-</sup>] (SY2183) strains expressing Hsp104-GFP by microscopy (n>150 cells/strain). **b.** The number of cells with visible fluorescent foci was determined in WT [PSI<sup>+</sup>] (SLL2606) and [psi<sup>-</sup>] (SY2119), ΔNatA [PSI<sup>+</sup>] (SY319) and [psi<sup>-</sup>] (SY978) and [PSI<sup>+</sup>] SUP35(S2P) ssa1(S2P) ssb1(S2P) (SY2182) strains following fixation and staining for Ssa1/2 (white) and Ssb1/2 (gray) (n ≥ 20 cells).

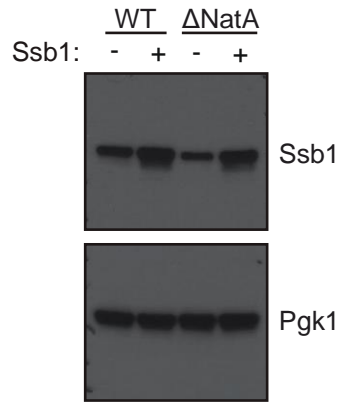

**Supplementary Figure 6.** SDS-PAGE analysis of lysates isolated from [*PSI*<sup>+</sup>] WT (SLL2606) and  $\Delta$ NatA (SY319) strains expressing either an empty vector (-) or high copy (2 $\mu$ ) expression plasmid for Ssb1 (SB806). The gels were immunoblotted for Ssb1/2 or Pgk1 (loading control) using specific antisera.

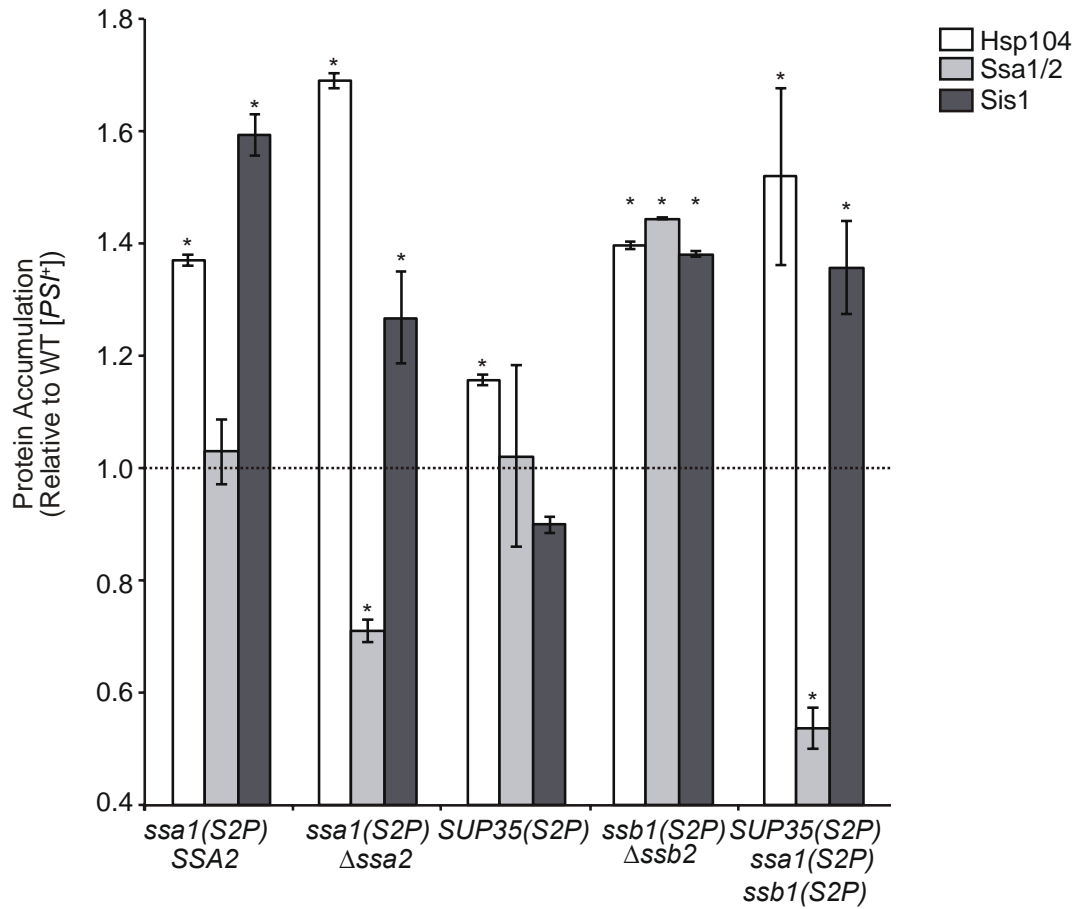

**Supplementary Figure 7.** Relative levels of Hsp104, Ssa1/2, and Sis1 protein in the [PSI<sup>+</sup>]  $\Delta$ *ssa2* (SY1338), *ssa1(S2P)* (SY1308), *ssa1(S2P)*  $\Delta$ *ssa2* (SY1339), SUP35(S2P) (SY1209), *ssab1(S2P)*  $\Delta$ SSB2 (SY1965), SUP35(S2P) *ssa1(S2P)* *ssb1(S2P)* (SY2182) strains compared to WT [PSI<sup>+</sup>] (SY2606) as determined by SDS-PAGE and quantitative immunoblotting with specific antisera (n=6, \*p<0.003, error bars represent standard deviation).



**a**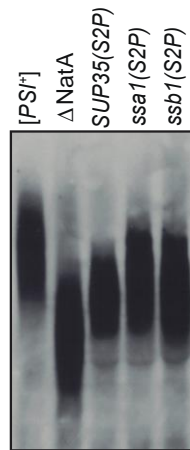**b**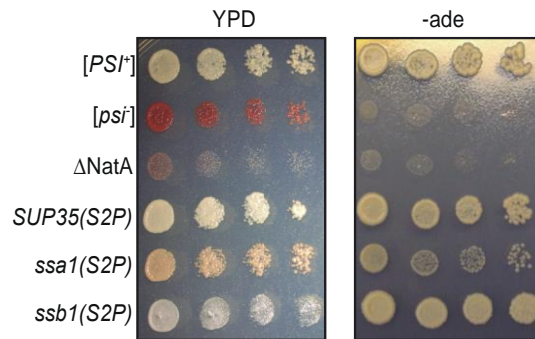

**Supplementary Figure 8. a.** Lysates isolated from  $[PSI^+]$  strains expressing non-acetylatable (S2P) mutants of *SUP35* (SY1209), *SSA1* (SY1339), or *SSB1* (SY1965) were analyzed by SDD-AGE followed by immunoblotting for Sup35. **b.** 10-fold serial dilutions of cultures of WT ( $[PSI^+]$  and  $[psi^-]$ ) (SLL2606 and SLL2119),  $[PSI^+]$   $\Delta$ NatA (SY319),  $[PSI^+]$  *SUP35(S2P)* (SY1209),  $[PSI^+]$  *ssa1(S2P)* (SY1339), and  $[PSI^+]$  *ssb1(S2P)* (SY1965), expressing strains were grown on rich medium (YPD) and medium lacking adenine (-ade) at 30°C.

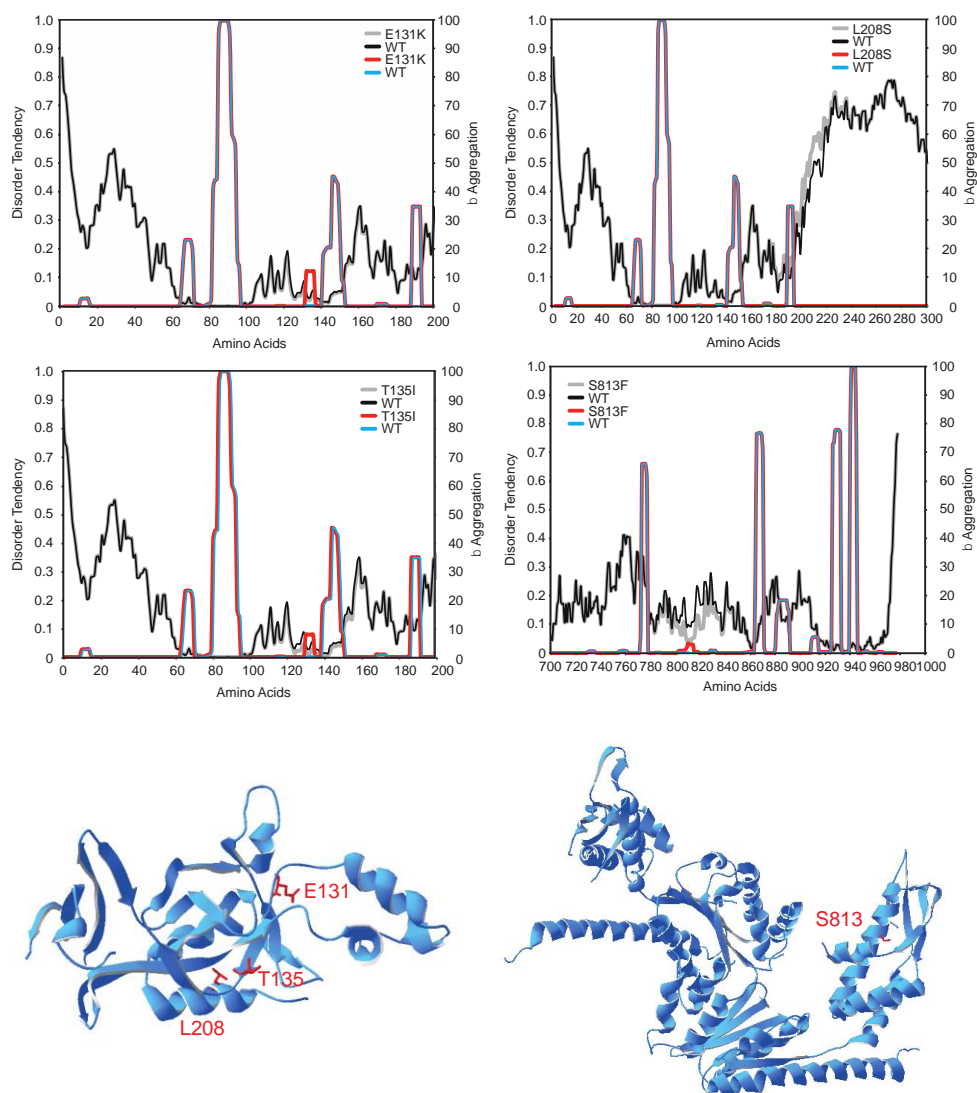

**Supplementary Figure 9.** Sir3 mutations that enhance the mating defect of  $\Delta$ NatA. The Sir3 sequence was analyzed for disorder (IUPred, black) and aggregation potential (Tango, blue) and compared to the disorder (black) and aggregation potential (red) for the indicated Sir3 mutations. The positions of the mutations on Sir3 crystal structures (PDB files 4KUI and 3TE6) are indicated below.<sup>2,3</sup>

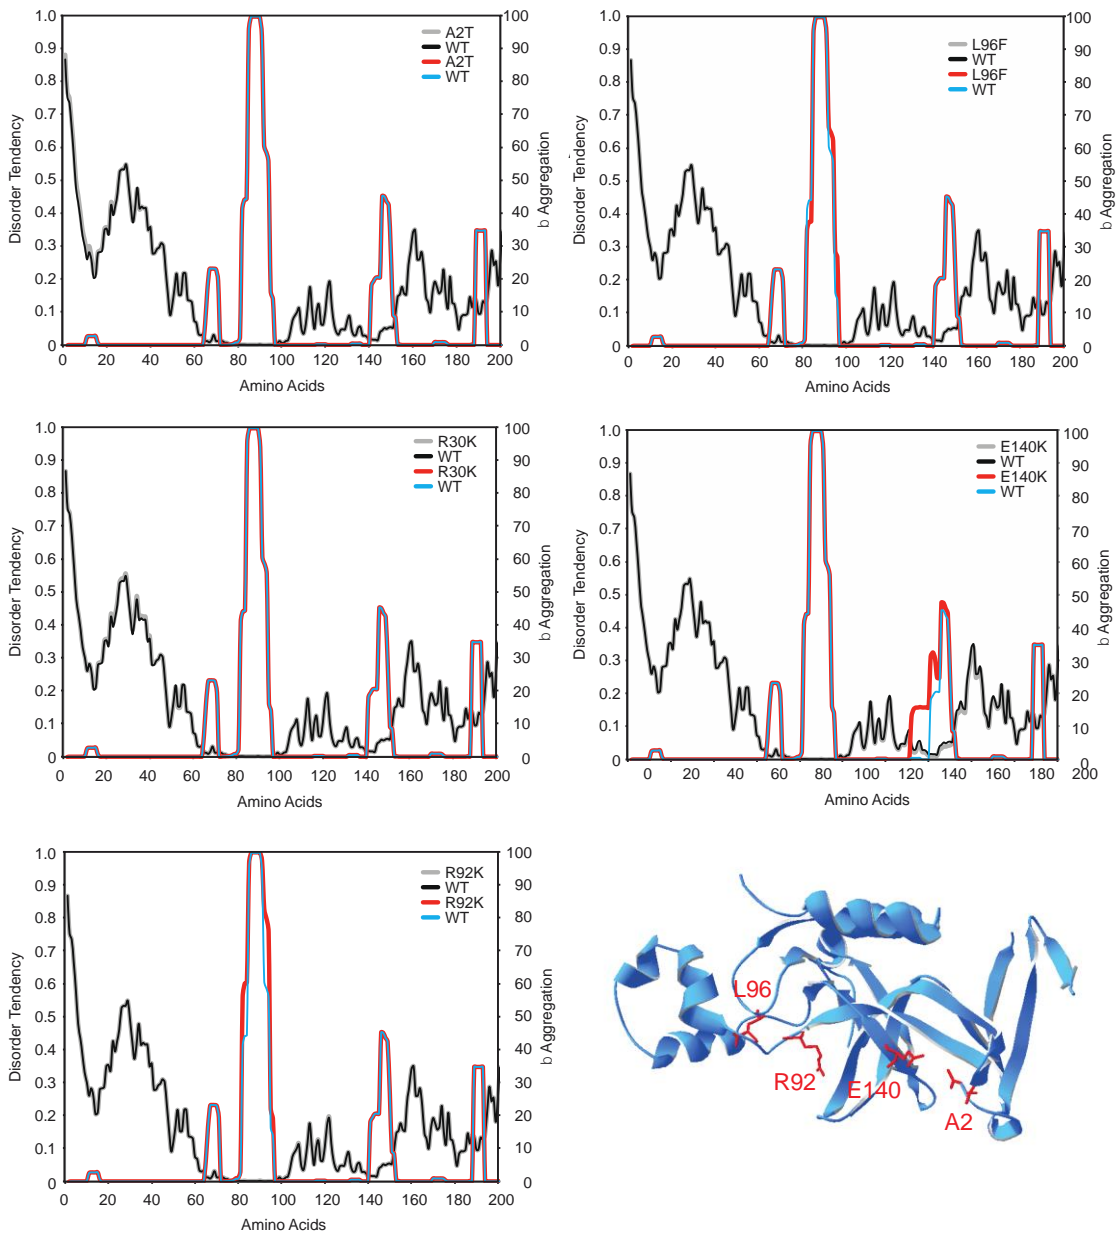

**Supplementary Figure 10.** Sir3 mutations that do not enhance the mating defect of  $\Delta$ NatA. The Sir3 sequence was analyzed as in the legend to Fig. S9. The positions of the mutations on the Sir3 crystal structure (PDB file 4KUI) are indicated below. The R30K is located in a region of the protein that is not present in the structure presumably due to its flexibility.<sup>2</sup>

**Supplementary Table 1. Primers**

| Primer           | Sequence                                                                  |
|------------------|---------------------------------------------------------------------------|
| 5' Hsf1<br>KO    | 5'GAAACAAAAAAGACAAAAAGACAGCTGTATTGTTGGCGCCCAG<br>CTGAAGCTTCGTACG3'        |
| 3' Hsf1<br>KO    | 5'AAATGATTATATACGCTATTTAATGACCTTGCCCTGTGTAGCAT<br>AGGCCACTAGTGGATCTG3'    |
| 5' Hsf1<br>Seq   | 5'TAACCTAAGGCAAAGGGTTTGTTCATATAC3'                                        |
| 3' Hsf1<br>Seq   | 5'AAAGTTATGTAATATGCGAATTCTGTTTCTGCTTG3'                                   |
| PTEF<br>CHK      | 5'GCACGTCAAGACTGTCAAGG3'                                                  |
| pFA6a            | 5'TGCCCAGATGCGAAGTTAAGTG3'                                                |
| 5' Hsf1<br>R206S | 5'GAAAATCTTTTATTGTCACGAATAGTGAGGAATTTGTGCACCAA<br>ATTTTAC3'               |
| 3' Hsf1<br>R206S | 5'GTAAAATTTGGTGACAAATTCCTCACTATTCGTGACAATAAAA<br>GATTTTC3'                |
| Hsf1 Mid<br>Seq  | 5'ACAGCCGTCAAGTGGAAC3'                                                    |
| 5' pSsb1         | 5'GCCGAGCTCCATTGCCCTAGATCATCTCATGCATGA3'                                  |
| 3' pSsb1         | 5'GCCGGATCCTTTGTTCAATTAATAACTGTAATGATCTTGGGAC<br>ATC3'                    |
| 5' Ssb1<br>WT    | 5'GCCGGATCCATGGCTGAAGGTGTTTTCCAAGGTGCTATCGGT<br>ATCGA3'                   |
| 5' Ssb1<br>S2P   | 5'GCCGGATCCATGCCTGAAGGTGTTTTCCAAGGTGCTATCGGTA<br>TCGA3'                   |
| 3' Ssb1          | 5'GCCCTCGAGTTAACGAGAAGACATGGCCTTGGTGACAAC T3'                             |
| 5' Ssb1<br>Seq   | 5'TTTTGAACAGATTCGTTCGTTCGAATCTTCTA3'                                      |
| 3' Ssb1<br>Seq   | 5'CCATGCTGCCAAGTATCTTAACAGTCTTT3'                                         |
| 5' Ssb1<br>KO    | 5'CAGATGTCCCAAGATCATTACAGTATTTTAATTGAACAAACGGA<br>TCCCCGGGTTAATTAA3'      |
| 3' Ssb1<br>KO    | 5'CAATATAAGTAATATTCATATATATGTGATGAATGCAGTCGAAT<br>TCGAGCTCGTTTAAAC3'      |
| 5' Ssb2<br>KO    | 5'TCGTTTTTTCTTTCAAGAAACCAAGAACCAATATCCTCATTAAC<br>ACGGATCCCCGGGTTAATTAA3' |
| 3' Ssb2<br>KO    | 5'AAAATATATATATGTGTATAACCTTAACCAGAATGACATCGAAT<br>TCGAGCTCGTTTAAAC3'      |
| 5Sti1pFA<br>6a   | 5'TCCTCACTGTAGCTACTAAACAACCTATACGCAAGAAAGCAGC<br>TGAAGCTTCGTACGC3'        |
| 3Sti1pFA<br>6a   | 5'AAAAGAATTCAAGATAATAAGTTATATTTTCGTATTATTTGCATA<br>GGCCACTAGTGGATCTG3'    |

## Supplementary Table 2. Shuttle Plasmids

| Name    | Plasmid                                             | Reference                    |
|---------|-----------------------------------------------------|------------------------------|
| SB548   | pRS306-P <sub>SUP35</sub> -SUP35(S2P)               | Pezza <i>et al.</i> (2009)   |
| SB629   | pRS305-P <sub>SUP35</sub> -SUP35-HA                 | DiSalvo <i>et al.</i> (2011) |
| SB732   | pRS306-P <sub>SSB1-ssb1</sub> (S2P)                 | This study                   |
| SB753   | pHSE-lacZ                                           | Liu <i>et al.</i> (1998)     |
| SB757   | pSTRE-lacZ                                          | Liu <i>et al.</i> (1998)     |
| SB778   | pRS315-EXA3-1                                       | Halliday and Craig (1995)    |
| SB779   | pRS313-P <sub>HSF1</sub> HSF1                       | Halliday and Craig (1995)    |
| SB788   | pRS313-P <sub>HSF1</sub> HSF1(R206S)                | This study                   |
| SB806   | pRS424-P <sub>HSF1</sub> HSF1(R206S)                | This study                   |
| SB812   | pRS426-P <sub>HSF1</sub> HSF1                       | This study                   |
| SB814   | pRS424-P <sub>GPD-SSB1</sub>                        | This study                   |
| SLL6676 | pRS316-P <sub>SUP35</sub> -SUP35 <sup>254-685</sup> | Zhou <i>et al.</i> (2001)    |

**Supplementary Table 3. *Saccharomyces cerevisiae* Strains**

| Strain            | Genotype                                                                                                                                                                                                                    | Reference                      |
|-------------------|-----------------------------------------------------------------------------------------------------------------------------------------------------------------------------------------------------------------------------|--------------------------------|
| 74D-694 (SLL2606) | <i>MAT<sub>a</sub></i> [ <i>PSI<sup>+</sup></i> ] <i>ade1-14 trp1-289 his3<math>\Delta</math>200 ura3-52 leu2-3, 112</i>                                                                                                    | Chernoff <i>et. al.</i> (1995) |
| 74D-694 (SLL2119) | <i>MAT<sub>a</sub></i> [ <i>psi</i> -] <i>ade1-14 trp1-289 his3<math>\Delta</math>200 ura3-52 leu2-3, 112</i>                                                                                                               | Chernoff <i>et. al.</i> (1995) |
| SY319             | <i>MAT<math>\alpha</math></i> [ <i>PSI<sup>+</sup></i> ] <i>ade1-14 trp1-289 his3<math>\Delta</math>200 ura3-52 leu2-3, 112 <math>\Delta</math>nat1::hphMX4 <math>\Delta</math>ard1::kanMX4</i>                             | Pezza <i>et. al.</i> (2009)    |
| SY394             | <i>MAT<math>\alpha</math></i> [ <i>PSI<sup>+</sup></i> ] <i>ade1-14 trp1-289 ura3-52 his3<math>\Delta</math>200 leu2-3, 112 <math>\Delta</math>ssb2::hisMX4 <math>\Delta</math>ssb1::kanMX6</i>                             | This study                     |
| SY441             | <i>MAT<math>\alpha</math></i> [ <i>psi</i> ] <i>ade1-14 trp1-289 ura3-52 his3<math>\Delta</math>200 leu2-3, 112 <math>\Delta</math>ssb2::his3MX4 <math>\Delta</math>ssb1::kanMX6</i>                                        | This study                     |
| SY536             | <i>MAT<math>\alpha</math></i> [ <i>PSI<sup>+</sup></i> ] <i>ade1-14 trp1-289 his3<math>\Delta</math>200 ura3-52 leu2-3, 112 <math>\Delta</math>nat3::hisMX4</i>                                                             | Pezza <i>et. al.</i> (2009)    |
| SY540             | <i>MAT<math>\alpha</math></i> [ <i>PSI<sup>+</sup></i> ] <i>ade1-14 trp1-289 his3<math>\Delta</math>200 ura3-52 leu2-3, 112 <math>\Delta</math>mak3::hisMX4</i>                                                             | Pezza <i>et. al.</i> (2009)    |
| SY563             | <i>MAT<math>\alpha</math></i> [ <i>psi</i> -] <i>ade1-14 trp1-289 his3<math>\Delta</math>200 ura3-52 leu2-3, 112 <math>\Delta</math>nat3::hisMX4</i>                                                                        | Pezza <i>et. al.</i> (2009)    |
| SY567             | <i>MAT<sub>a</sub></i> [ <i>psi</i> ] <i>ade1-14 trp1-289 his3<math>\Delta</math>200 ura3-52 leu2-3, 112 <math>\Delta</math>mak3::hisMX4</i>                                                                                | Pezza <i>et. al.</i> (2009)    |
| SY978             | <i>MAT<math>\alpha</math></i> [ <i>psi</i> ] <i>ade1-14 trp1-289 his3<math>\Delta</math>200 ura3-52 leu2-3, 112 <math>\Delta</math>nat1::hphMX4 <math>\Delta</math>ard1::kanMX4</i>                                         | Pezza <i>et. al.</i> (2009)    |
| SY1132            | <i>MAT<sub>a</sub></i> [ <i>PSI<sup>+</sup></i> ] <sup>weak</sup> <i>ade1-14 trp1-289 his3<math>\Delta</math>200 ura3-52 leu2-3, 112 <math>\Delta</math>nat1::hphMX4 <math>\Delta</math>ard1::kanMX4</i>                    | This study                     |
| SY1209            | <i>MAT<math>\alpha</math></i> [ <i>PSI<sup>+</sup></i> ] <i>ade1-14 trp1-289 his3<math>\Delta</math>200 ura3-52 leu2-3, 112 SUP35(S2P)</i>                                                                                  | Pezza <i>et. al.</i> (2009)    |
| SY1308            | <i>MAT<math>\square</math></i> [ <i>PSI<sup>+</sup></i> ] <i>ade1-14 trp1-289 his3<math>\Delta</math>200 ura3-52 leu2-3, 112 ssa1(S2P)</i>                                                                                  | Pezza <i>et. al.</i> (2009)    |
| SY1339            | <i>MAT<math>\alpha</math></i> [ <i>PSI<sup>+</sup></i> ] <i>ade1-14 trp1-289 his3<math>\Delta</math>200 ura3-52 leu2-3, 112 <math>\Delta</math>ssa2::hphMX4 ssa1(S2P)</i>                                                   | Pezza <i>et. al.</i> (2009)    |
| SY1500            | <i>MAT<math>\alpha</math></i> [ <i>PSI<sup>+</sup></i> ] <i>ade1-14 trp1-289 his3<math>\Delta</math>200 ura3-52 leu2-3, 112::P<sub>sup35</sub>-SUP35(HA)</i>                                                                | This study                     |
| SY1501            | <i>MAT<math>\alpha</math></i> [ <i>psi</i> ] <i>ade1-14 trp1-289 his3<math>\Delta</math>200 ura3-52 leu2-3, 112::P<sub>sup35</sub>-SUP35(HA)</i>                                                                            | This study                     |
| SY1502            | <i>MAT<math>\alpha</math></i> [ <i>PSI<sup>+</sup></i> ] <i>ade1-14 trp1-289 his3<math>\Delta</math>200 ura3-52 leu2-3, 112::P<sub>sup35</sub>-SUP35(HA) <math>\Delta</math>ard1::kanMX4</i>                                | This study                     |
| SY1906            | <i>MAT<math>\alpha</math></i> [ <i>PSI<sup>+</sup></i> ] <i>ade1-14 trp1-289 his3<math>\Delta</math>200 ura3-52 leu2-3, 112 HSP104-GFP::kanMX6</i>                                                                          | This study                     |
| SY1965            | <i>MAT<math>\alpha</math></i> [ <i>PSI<sup>+</sup></i> ] <i>ade1-14 trp1-289 his3<math>\Delta</math>200 leu2-3, 112 <math>\Delta</math>ssb2::hisMX4 <math>\Delta</math>ssb1::kanMX6 ura3-52::P<sub>ssb1</sub>-ssb1(S2P)</i> | This study                     |

|         |                                                                                                                                                                                                   |                        |
|---------|---------------------------------------------------------------------------------------------------------------------------------------------------------------------------------------------------|------------------------|
| SY2051  | <i>MAT<sub>a</sub></i> [ <i>PSI<sup>t</sup></i> ] <i>ade1-14 trp1-289 his3Δ200 ura3-52 leu2-3, 112 Δhsf1::hphMX4 [CEN P<sub>hsf</sub>-HSF1]</i>                                                   | This study             |
| SY2053  | <i>MAT<sub>a</sub></i> [ <i>PSI<sup>t</sup></i> ] <i>ade1-14 trp1-289 his3Δ200 ura3-52 leu2-3, 112 Δhsf1::hphMX4 [CEN P<sub>hsf</sub>-HSF1<sup>R206S</sup>]</i>                                   | This study             |
| SY2123  | <i>MAT<sub>α</sub></i> [ <i>PSI<sup>t</sup></i> ] <i>ade1-14 trp1-289 his3Δ200 ura3-52 leu2-3, 112 Δssa2::hphMX4 ssa1(S2P) SUP35(S2P)</i>                                                         | This study             |
| SY2124  | <i>MAT<sub>a</sub></i> [ <i>PSI<sup>t</sup></i> ] <i>ade1-14 trp1-289 his3Δ200 ura3-52 leu2-3, 112 SUP35(S2P) □ Δhsf1::hphMX4 [2 micron P<sub>hsf</sub>-HSF1<sup>R206S</sup>]</i>                 | This study             |
| SY2125  | <i>MAT<sub>α</sub></i> [ <i>psi</i> ] <i>ade1-14 trp1-289 his3Δ200 ura3-52 leu2-3, 112 HSP104-GFP::kanMX6</i>                                                                                     | This study             |
| SY2129  | <i>MAT<sub>a</sub></i> [ <i>PSI<sup>t</sup></i> ] <i>ade1-14 trp1-289 his3Δ200 ura3-52 leu2-3, 112 SUP35(S2P) Δhsf1::hphMX4 [2 micron P<sub>hsf</sub>-HSF1]</i>                                   | This study             |
| SY2130  | <i>MAT<sub>α</sub></i> [ <i>PSI<sup>t</sup></i> ] <i>ade1-14 trp1-289 his3Δ200 ura3-52 leu2-3, 112 Δhsf1::hphMX4 [2 micron P<sub>hsf</sub>-HSF1<sup>R206S</sup>]</i>                              | This study             |
| SY2152  | <i>MAT<sub>α</sub></i> [ <i>PSI<sup>t</sup></i> ] <i>ade1-14 trp1-289 his3Δ200 ura3-52 leu2-3, 112 Δard1::kanMX6 HSP104-GFP::kanMX6</i>                                                           | This study             |
| SY2153  | <i>MAT<sub>α</sub></i> [ <i>psi</i> ] <i>ade1-14 trp1-289 his3Δ200 ura3-52 leu2-3, 112::P<sub>sup35</sub>-SUP35(HA) Δard1::kanMX4</i>                                                             | This study             |
| SY2154  | <i>MAT<sub>α</sub></i> [ <i>PSI<sup>t</sup></i> ] <i>ade1-14 trp1-289 his3Δ200 ura3-52 leu2-3, 112 Δard1::kanMX4 SUP35(S2P)</i>                                                                   | This study             |
| SY2182  | <i>MAT<sub>α</sub></i> [ <i>PSI<sup>t</sup></i> ] <i>ade1-14 trp1-289 his3Δ200 leu2-3, 112 Δssb2::hisMX4 Δssb1::KanMX6 Δssa2::hphMX4 ura3-52::P<sub>ssb1</sub>-ssb1(S2P) ssa1(S2P) SUP35(S2P)</i> | This study             |
| SY2183  | <i>MAT<sub>α</sub></i> [ <i>psi</i> ] <i>ade1-14 trp1-289 his3Δ200 ura3-52 leu2-3, 112 Δard1::kanMX6 HSP104-GFP::kanMX6</i>                                                                       | This study             |
| SY2195  | <i>MAT<sub>α</sub></i> [ <i>PSI<sup>t</sup></i> ] <i>ade1-14 trp1-289 his3Δ200 leu2-3, 112 Δssb2::hisMX4 Δssb1::kanMX6 ura3-52::P<sub>ssb1</sub>-ssb1(S2P) SUP35(S2P)</i>                         | This study             |
| SY2348  | <i>MAT<sub>α</sub></i> [ <i>PSI<sup>t</sup></i> ] <i>ade1-14 trp1-289 his3Δ200 ura3-52 leu2-3, 112 Δsti1::kanMX6</i>                                                                              | This study             |
| SLL2600 | <i>MAT<sub>a</sub></i> [ <i>PSI<sup>t</sup></i> ] <sup>weak</sup> <i>ade1-14 trp1-289 his3Δ200 ura3-52 leu2-3, 112</i>                                                                            | Derkatch et al. (1999) |

**Supplementary Table 4. Two-sample Kolmogorov-Smirnov tests on lengths of disordered regions**

|                | By NatA                             | By NatB                              | By NatC                             |
|----------------|-------------------------------------|--------------------------------------|-------------------------------------|
| Not acetylated | D = 0.08;<br>$p = 2 \times 10^{-6}$ | D = 0.15;<br>$p = 2 \times 10^{-15}$ | D = 0.19;<br>$p = 6 \times 10^{-9}$ |
| By NatA        |                                     | D = 0.10;<br>$p = 8 \times 10^{-6}$  | D = 0.12;<br>$P = 2 \times 10^{-3}$ |
| By NatB        |                                     |                                      | D = 0.14;<br>$p = 4 \times 10^{-4}$ |



### Supplementary References

- 1 Gasch, A. P. *et al.* Genomic expression programs in the response of yeast cells to environmental changes. *Mol Biol Cell* **11**, 4241-4257 (2000).
- 2 Yang, D. *et al.* Nalpha-acetylated Sir3 stabilizes the conformation of a nucleosome-binding loop in the BAH domain. *Nature Struct Mol Biol* **20**, 1116-1118 (2013).
- 3 Ehrentraut, S. *et al.* Structural basis for the role of the Sir3 AAA+ domain in silencing: interaction with Sir4 and unmethylated histone H3K79. *Genes Dev* **25**, 1835-1846 (2011).
